# Supplementary material for: Autophagy and protein aggregation as a mechanism of dopaminergic degeneration in a primary human dopaminergic neuronal model
Source: PubMed Central journal article supplement — Toxicol Rep. 2022 Apr 1;9:806–13. doi: 10.1016/j.toxrep.2022.03.047 (PMC9742814; doi:10.1016/j.toxrep.2022.03.047), 2022-04-01
Supplement: mmc1.pdf [file mmc1.pdf]

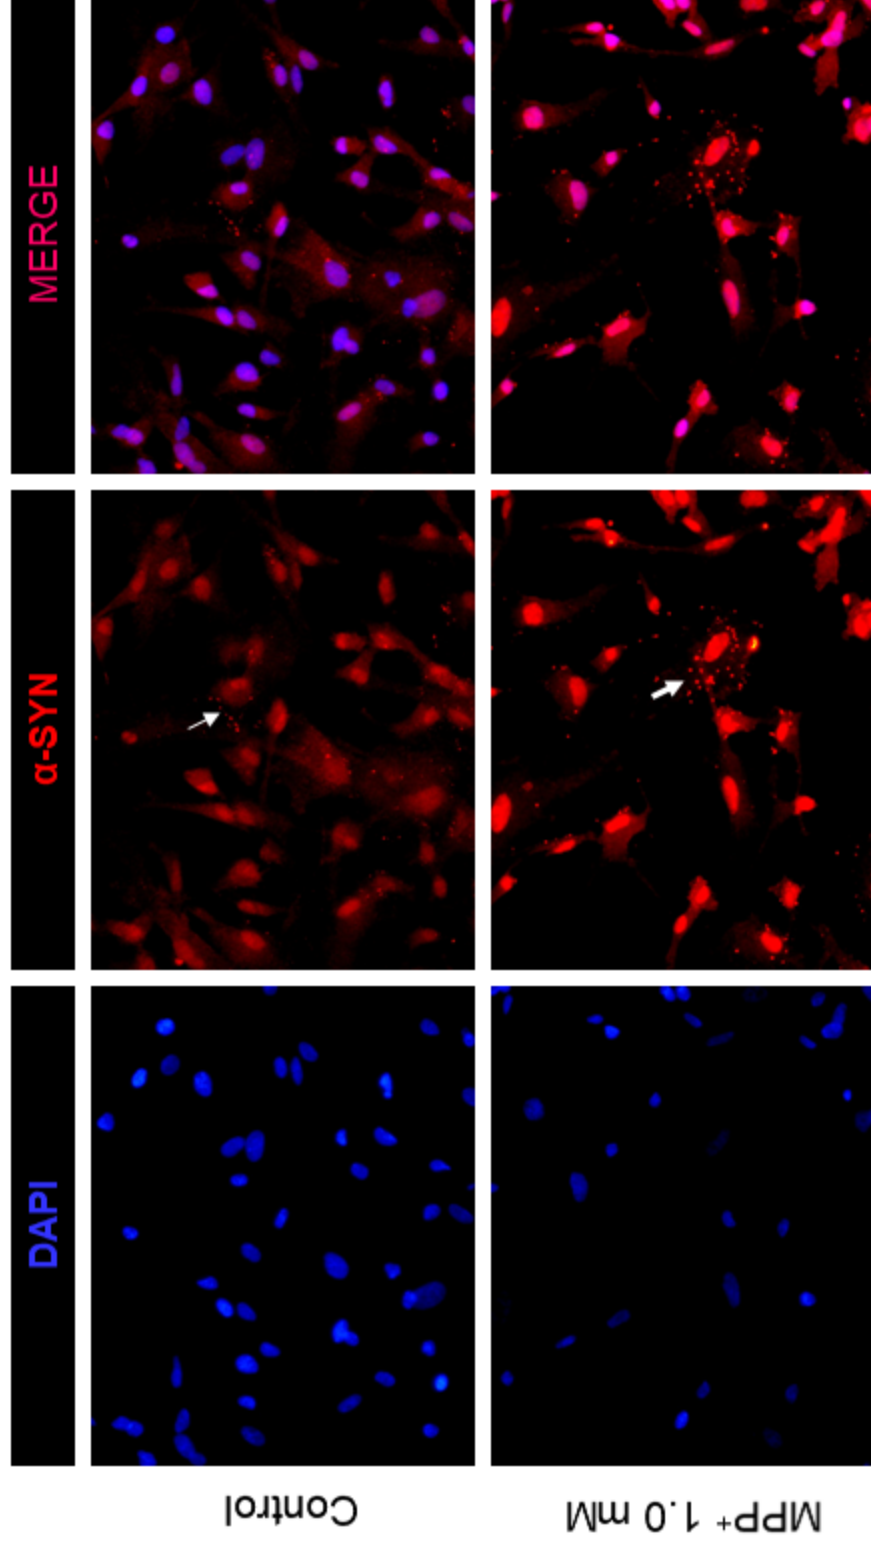

**Supplement figure 3a. Aggregation of  $\alpha$ -SYN.** Label of  $\alpha$ -SYN displayed more and bigger dots, that might indicate aggregation of  $\alpha$ -SYN. Additional test is necessary to support these evidence, such as EM or additional aggregation indicators. Morphological changes were evaluated, of three independent experiments, pictures were taken at 20X.
