# Supplementary material for: Autophagy and protein aggregation as a mechanism of dopaminergic degeneration in a primary human dopaminergic neuronal model
Source: PubMed Central journal article supplement — Toxicol Rep. 2022 Apr 1;9:806–13. doi: 10.1016/j.toxrep.2022.03.047 (PMC9742814; doi:10.1016/j.toxrep.2022.03.047), 2022-04-01
Supplement: mmc2.pdf [file mmc2.pdf]

| ASSAY      | Tukey's multiple comparisons test | Mean Diff. | 95% CI of diff.  | Significant? | Summary | N |
|------------|-----------------------------------|------------|------------------|--------------|---------|---|
| LDH        | 0 vs. 0.1                         | -0.9035    | -63.76 to 61.95  | No           | ns      | 3 |
|            | 0 vs. 0.5                         | -8.305     | -71.16 to 54.55  | No           | ns      | 3 |
|            | 0 vs. 1                           | -22.47     | -85.33 to 40.39  | No           | ns      | 3 |
|            | 0 vs. 5                           | -127.6     | -190.4 to -64.73 | Yes          | ****    | 3 |
|            | 0 vs. 10                          | -186.3     | -249.2 to -123.5 | Yes          | ****    | 3 |
| XTT        | 0 vs. 0.1                         | -1.205     | -14.37 to 11.96  | No           | ns      | 3 |
|            | 0 vs. 0.5                         | 7.763      | -5.406 to 20.93  | No           | ns      | 3 |
|            | 0 vs. 1                           | 14.8       | 1.634 to 27.97   | Yes          | *       | 3 |
|            | 0 vs. 2.5                         | 55.27      | 42.10 to 68.44   | Yes          | ****    | 3 |
|            | 0 vs. 5                           | 77.24      | 64.07 to 90.41   | Yes          | ****    | 3 |
| LIVE CELLS | 0 vs. 0.1                         | -17.46     | -44.88 to 9.970  | No           | ns      | 3 |
|            | 0 vs. 0.5                         | 34.24      | 6.816 to 61.67   | Yes          | **      | 3 |
|            | 0 vs. 1                           | 33.36      | 5.937 to 60.79   | Yes          | **      | 3 |
|            | 0 vs. 5                           | 88.28      | 60.86 to 115.7   | Yes          | ****    | 3 |
|            | 0 vs. 1                           | -93.43     | -145.1 to -41.78 | Yes          | ***     | 3 |
| LAMP-1     | 0 vs. 2.5                         | -176.6     | -228.3 to -125.0 | Yes          | ****    | 3 |
|            | 0 vs. 1                           | -10.43     | -30.36 to 9.508  | No           | ns      | 3 |
| LC3BII/I   | 0 vs. 2.5                         | -34.37     | -54.31 to -14.44 | Yes          | ***     | 3 |
|            | 0 vs. 1                           | 64.82      | 31.79 to 97.85   | Yes          | ****    | 3 |
| TH         | 0 vs. 2.5                         | 91.95      | 58.92 to 125.0   | Yes          | ****    | 3 |
|            | 0 vs. 1                           | 64.82      | 31.79 to 97.85   | Yes          | ****    | 3 |

**Supplement table 1. Summary of the data.** Data were analyzed using One-way ANOVA with post Tukey's multiple comparisons test. Each value represents the mean  $\pm$  SEM of three independent experiments. \* $p < 0.05$  \*\* $p < 0.01$ , \*\*\* $p < 0.001$  and \*\*\*\* $p < 0.0001$  vs control.
